# Supplementary material for: Preferential occupancy of Eu3+ and energy transfer in Eu3+ doped Sr2V2O7, Sr9Gd(VO4)7 and Sr2V2O7/Sr9Gd(VO4)7 phosphors
Source: Royal Society of Chemistry journal article supplement (doi:10.1039/c7ra08089a), 2018-01-01
Supplement: c7ra08089a1.pdf [file c7ra08089a1.pdf]

Supplementary materials

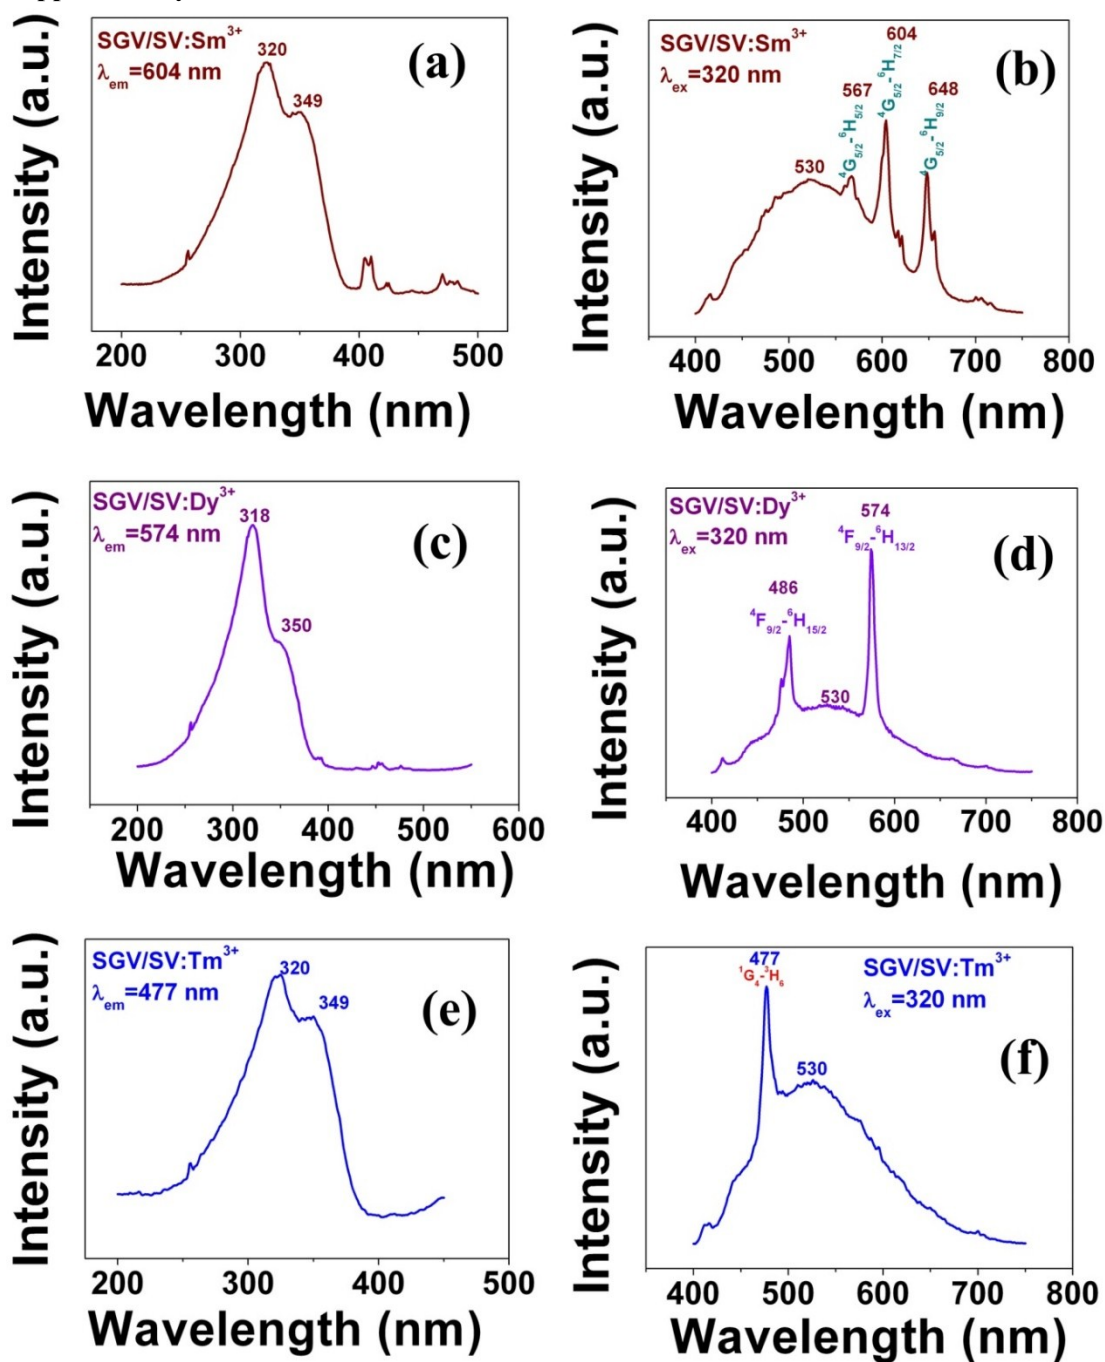

Figure S1. PL excitation and emission spectra of SGV/SV:Ln<sup>3+</sup>.(a) and (b): SGV/SV:Sm<sup>3+</sup>; (c) and (d): SGV/SV:Dy<sup>3+</sup>; (e) and (f):SGV/SV:Tm<sup>3+</sup>.
